# Supplementary material
Source: Research Square preprint supplement (doi:10.21203/rs.3.rs-8996032/v1)
Supplement: Supplementary file 1 [file 885a7447bbf548b88cb05828.docx]

**Intensified carotenoid accumulation in *Rhodotorula mucilaginosa* under Pb Stress**

Supplementary Materials


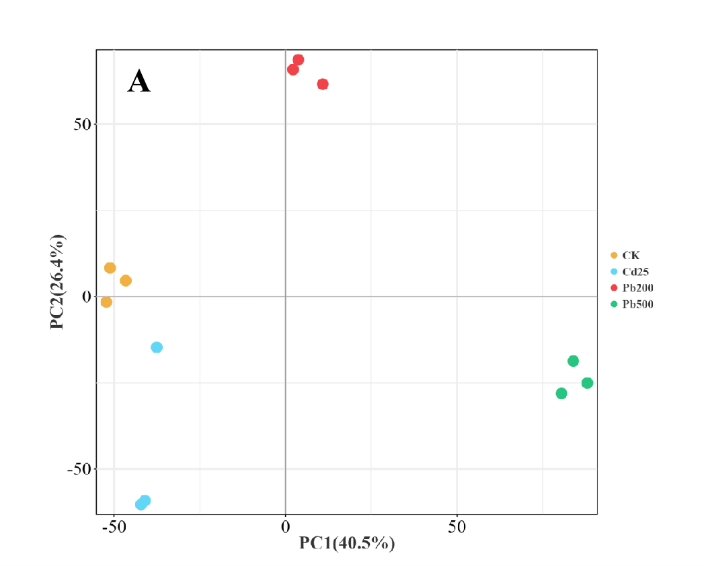

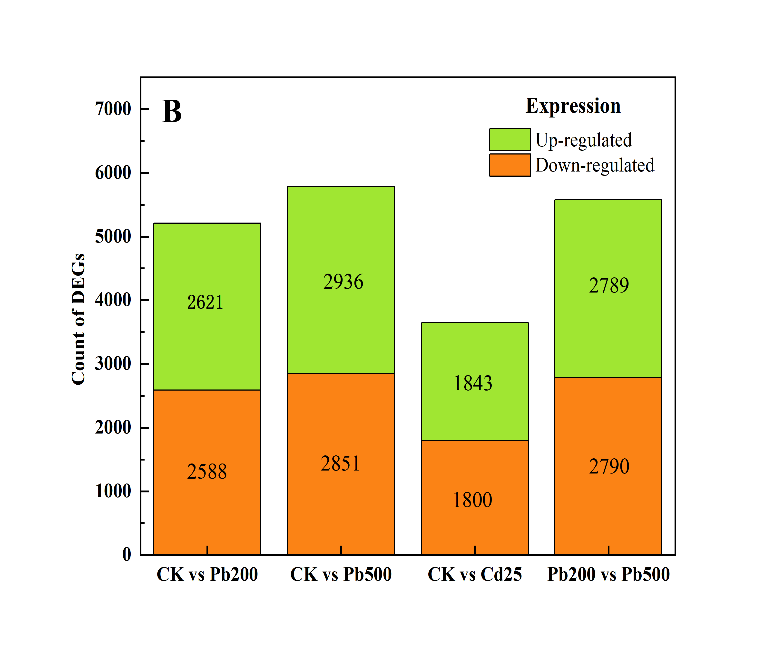


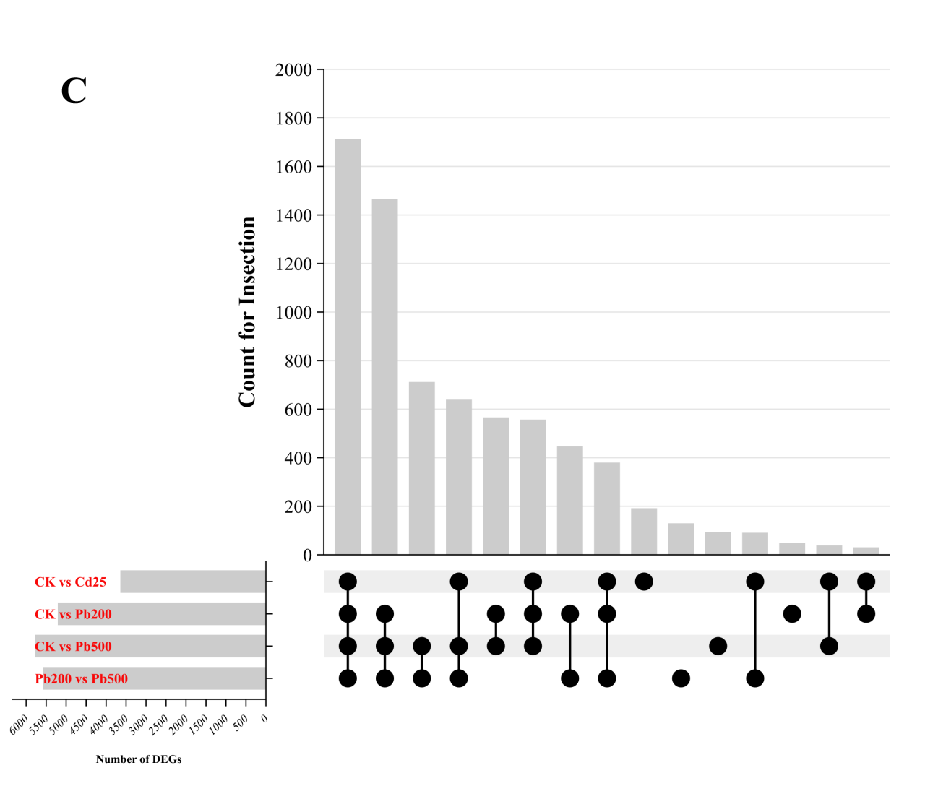


**Fig. S1.** **Characterization of the transcriptome dataset.** A: Principal component analysis of the RNA-Seq data, using normalized gene expression counts for each treatment group. Each dot represents one sample. B: Count of DEGs (Green: Up-regulated; Orange: Down-regulated). C: Upset venn plot of expressed genes in all the treatments.


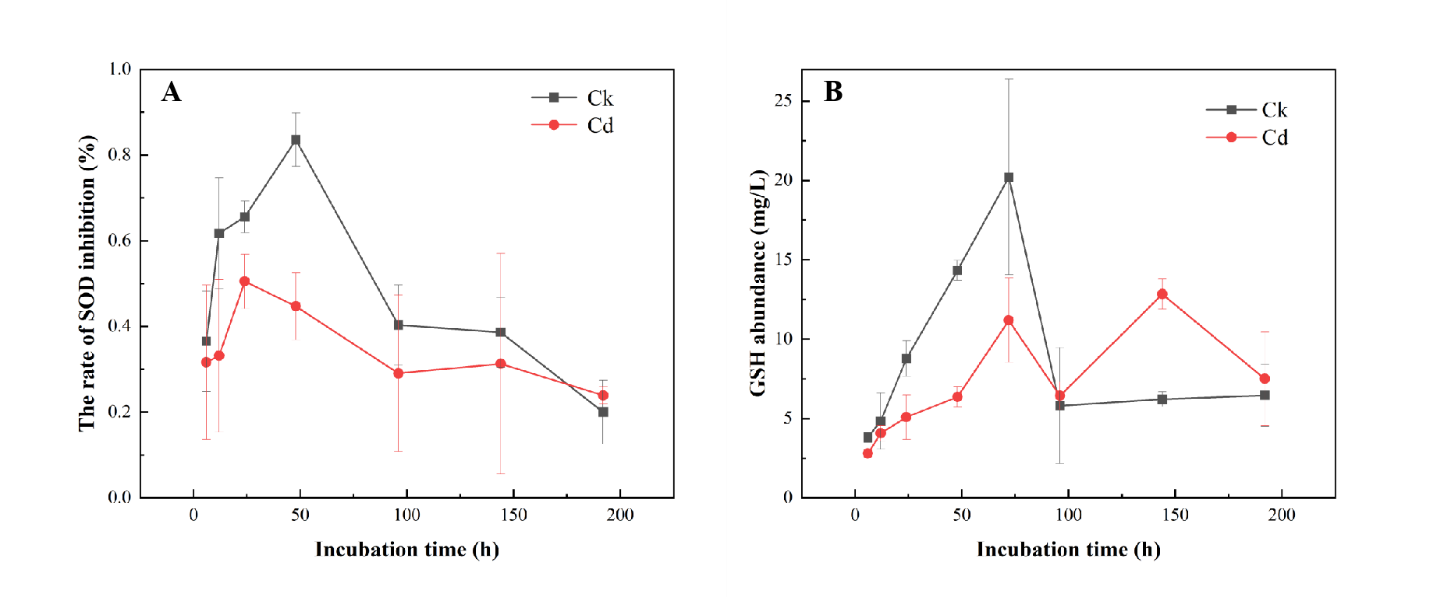
**
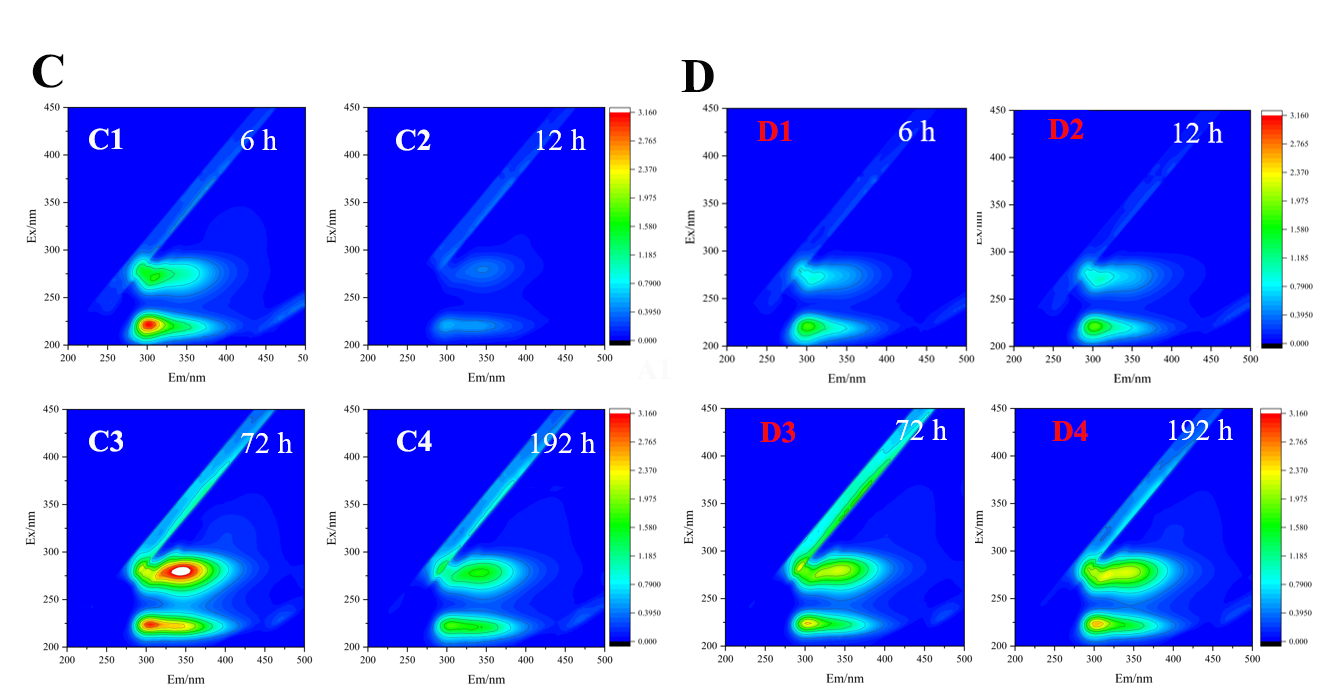
**

**Fig. S2.** **Metabolites content under higher Cd(Ⅱ) stress.** A: SOD enzyme relative activity (The rate of SOD inhibition). B: GSH abundance. Standard deviations are depicted, with N-5 replicates. C: Excitation-Emission-Matrix spectra of CK treatment. D: Excitation-Emission-Matrix spectra of Cd150 treatment. Lower-case letters above the bar indicate the significant differences among different treatments (p <0.05) after one-way ANOVA.

**
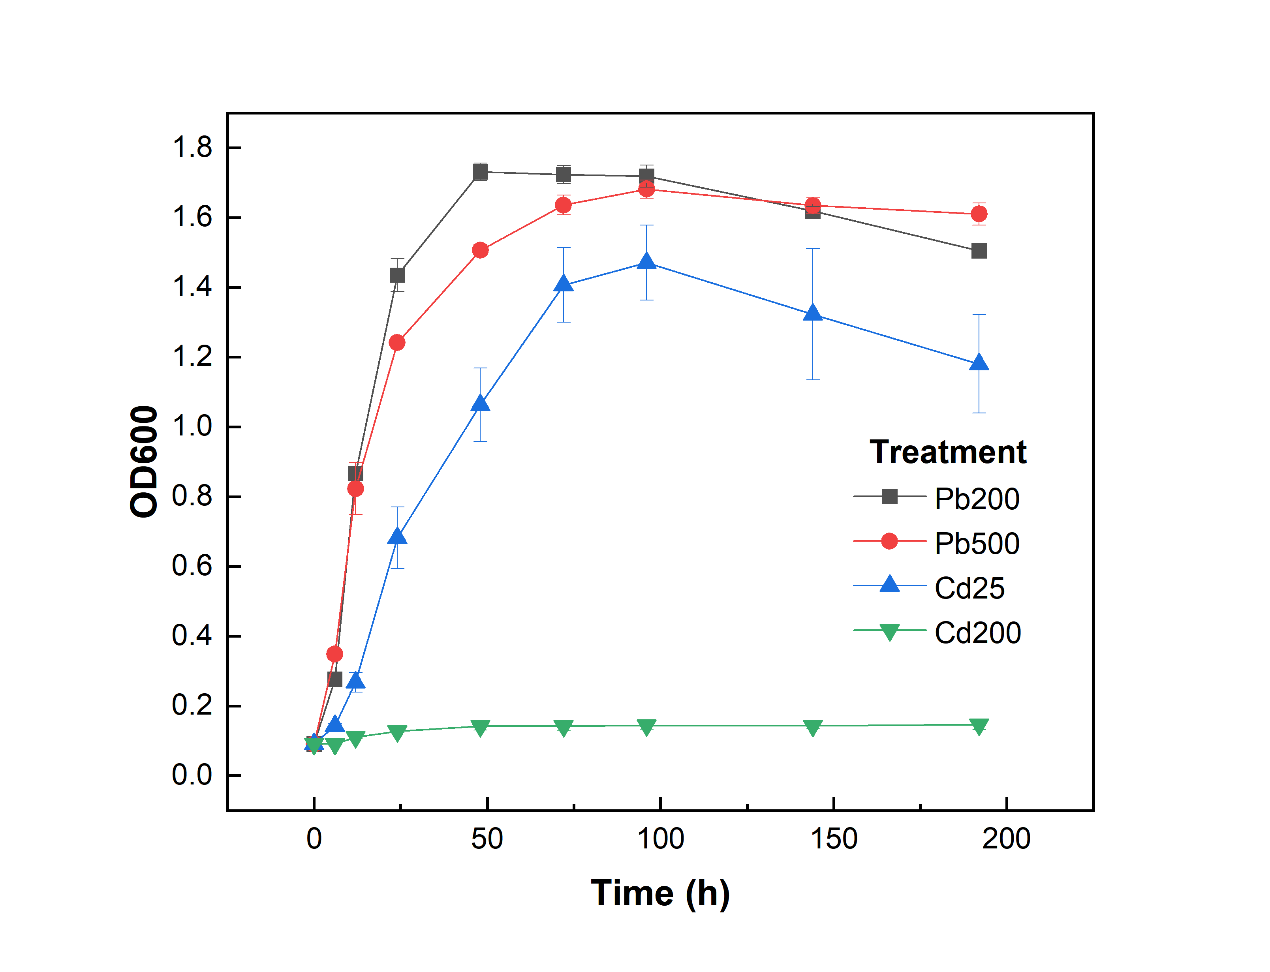
**

**Fig. S3. Growth curve of four main treatments in our study.**

**Table S1.** A list of all the treatments

| Treatments | | HM addition (mL) | *R. mucilaginosa* (mL) |
| --- | --- | --- | --- |
| Pb | CK | 0 | 1 |
| Pb100 | 0.1 | 1 |
| **Pb200** | **0.2** | **1** |
| **Pb500** | **0.5** | **1** |
| Pb1000 | 1.0 | 1 |
| Pb2500 | 2.5 | 1 |
| Cd | CK | 0 | 1 |
| **Cd25** | **0.25** | **1** |
| Cd50 | 0.5 | 1 |
| Cd100 | 1.0 | 1 |
| **Cd200** | **2.0** | **1** |

**Table S2.** Quality inspection results of RNA extraction

| Treatments | | Concentration (ng/μL) | Content (μg) |
| --- | --- | --- | --- |
| CK | CK_1 | 11.5 | 0.4 |
| CK_2 | 11.8 | 0.41 |
| CK_3 | 5.8 | 0.2 |
| Pb200 | Pb200_1 | 20.8 | 0.62 |
| Pb200_2 | 22.4 | 0.67 |
| Pb200_3 | 15.3 | 0.46 |
| Pb500 | Pb500_1 | 15.8 | 0.55 |
| Pb500_2 | 11.9 | 0.42 |
| Pb500_3 | 13.5 | 0.47 |
| **Cd25*** | **Cd25_1*** | **47.2*** | 1.65 |
| **Cd25_2*** | **43.1*** | 1.51 |
| **Cd25_3*** | **48.5*** | 1.7 |
| **Cd200#** | **Cd200_1#** | **0.6#** | 0.02 |
| **Cd200_2#** | **0.4#** | 0.01 |
| **Cd200_3#** | **0.7#** | 0.02 |

* Higher than average

# Lower than average

**Table S3A.** KEGG enrichment analysis of DEGs in four comparison groups (top 25 enriched pathways, comparison: CK vs Cd25, level1: metabolism).

| KEGG Pathway | Rich Ratio | *q*-value |
| --- | --- | --- |
| Glycolysis / Gluconeogenesis | 0.625 | 0.286 |
| Pentose phosphate pathway | 0.720 | 0.286 |
| Ascorbate and aldarate metabolism | 0.750 | 0.286 |
| Glycine, serine and threonine metabolism | 0.660 | 0.286 |
| Penicillin and cephalosporin biosynthesis | 1.000 | 0.286 |
| Arginine and proline metabolism | 0.684 | 0.286 |
| D-Amino acid metabolism | 1.000 | 0.286 |
| Sulfur metabolism | 0.714 | 0.286 |
| Metabolic pathways | 0.509 | 0.286 |
| Biosynthesis of secondary metabolites | 0.523 | 0.286 |
| **Tyrosine metabolism** | 0.667 | 0.321 |
| **Glutathione metabolism** | 0.639 | 0.321 |
| Pyruvate metabolism | 0.594 | 0.321 |
| beta-Alanine metabolism | 0.654 | 0.388 |
| Methane metabolism | 0.654 | 0.388 |
| Nitrogen metabolism | 0.714 | 0.425 |
| Arginine biosynthesis | 0.636 | 0.487 |
| Aflatoxin biosynthesis | 0.692 | 0.487 |
| Porphyrin metabolism | 0.650 | 0.487 |
| Lysine degradation | 0.607 | 0.499 |
| Carbon metabolism | 0.536 | 0.499 |
| Amino sugar and nucleotide sugar metabolism | 0.561 | 0.501 |
| Pentose and glucuronate interconversions | 0.632 | 0.513 |
| Starch and sucrose metabolism | 0.579 | 0.513 |
| Cysteine and methionine metabolism | 0.556 | 0.559 |

**Table S3B.** KEGG enrichment analysis of DEGs in four comparison groups (top 25 enriched pathways, comparison: CK vs Pb200, level1: metabolism).

| KEGG Pathway | Rich Ratio | *q*-value |
| --- | --- | --- |
| Amino sugar and nucleotide sugar metabolism | 0.912 | 0.328 |
| Fructose and mannose metabolism | 0.923 | 0.479 |
| Sulfur metabolism | 0.952 | 0.619 |
| Biosynthesis of nucleotide sugars | 0.906 | 0.677 |
| Pentose phosphate pathway | 0.920 | 0.703 |
| Thiamine metabolism | 0.941 | 0.893 |
| Galactose metabolism | 0.905 | 0.934 |
| **Oxidative phosphorylation** | 0.828 | 0.934 |
| Other types of O-glycan biosynthesis | 1.000 | 0.934 |
| Sphingolipid metabolism | 0.938 | 0.934 |
| Carbon metabolism | 0.818 | 0.958 |
| Glycolysis / Gluconeogenesis | 0.732 | 0.998 |
| **Citrate cycle (TCA cycle)** | 0.833 | 0.998 |
| Pentose and glucuronate interconversions | 0.789 | 0.998 |
| Ascorbate and aldarate metabolism | 0.563 | 0.998 |
| Fatty acid biosynthesis | 0.750 | 0.998 |
| Fatty acid elongation | 0.636 | 0.998 |
| Fatty acid degradation | 0.718 | 0.998 |
| Cutin, suberine and wax biosynthesis | 1.000 | 0.998 |
| Steroid biosynthesis | 0.706 | 0.998 |
| **Ubiquinone and other terpenoid-quinone biosynthesis** | 0.600 | 0.998 |
| Arginine biosynthesis | 0.818 | 0.998 |
| Purine metabolism | 0.803 | 0.998 |
| Caffeine metabolism | 1.000 | 0.998 |
| Pyrimidine metabolism | 0.784 | 0.998 |

**Table S3C.** KEGG enrichment analysis of DEGs in four comparison groups (top 25 enriched pathways, comparison: CK vs Pb500, level1: metabolism).

| KEGG Pathway | Rich Ratio | *q*-value |
| --- | --- | --- |
| Glycolysis / Gluconeogenesis | 0.732 | 0.989 |
| **Citrate cycle (TCA cycle)** | 0.700 | 0.989 |
| Fructose and mannose metabolism | 0.692 | 0.989 |
| Galactose metabolism | 0.714 | 0.989 |
| Fatty acid biosynthesis | 0.750 | 0.989 |
| Cutin, suberine and wax biosynthesis | 1.000 | 0.989 |
| **Ubiquinone and other terpenoid-quinone biosynthesis** | 0.733 | 0.989 |
| Arginine biosynthesis | 0.773 | 0.989 |
| Caffeine metabolism | 1.000 | 0.989 |
| Pyrimidine metabolism | 0.784 | 0.989 |
| Alanine, aspartate and glutamate metabolism | 0.689 | 0.989 |
| Aflatoxin biosynthesis | 0.846 | 0.989 |
| Glycine, serine and threonine metabolism | 0.700 | 0.989 |
| Cysteine and methionine metabolism | 0.722 | 0.989 |
| Valine, leucine and isoleucine degradation | 0.681 | 0.989 |
| Lysine biosynthesis | 0.833 | 0.989 |
| Lysine degradation | 0.714 | 0.989 |
| Penicillin and cephalosporin biosynthesis | 1.000 | 0.989 |
| Arginine and proline metabolism | 0.684 | 0.989 |
| **Tyrosine metabolism** | 0.703 | 0.989 |
| Phenylalanine metabolism | 0.789 | 0.989 |
| **Tryptophan metabolism** | 0.686 | 0.989 |
| Phenylalanine, tyrosine and tryptophan biosynthesis | 0.769 | 0.989 |
| beta-Alanine metabolism | 0.731 | 0.989 |
| Taurine and hypotaurine metabolism | 0.875 | 0.989 |
